1 Investigating the association between oral health behaviours  
2 and risk behaviours of university students – a quantitative  
3 study utilising online questionnaires.

4

5

6 Tanzeelah Azam<sup>1\*¶</sup>, George Kitsaras<sup>1&</sup>, Juliana Gomez<sup>2&</sup>, Michaela Goodwin<sup>1&</sup>

7 <sup>1</sup> Dental Health Unit, University of Manchester, Manchester, United Kingdom.

8 <sup>2</sup> Dental Health Unit, Colgate-Palmolive, Manchester, United Kingdom.

9

10 \*Corresponding author

11 Tanzeelah Azam (Email: [tanzeelah.azam@postgrad.manchester.ac.uk](mailto:tanzeelah.azam@postgrad.manchester.ac.uk))

12

13

14 ¶ These authors contributed equally to this work.

15 & These authors also contributed equally to this work.

16

17

18

19

20

21

22

23

NOTE: This preprint reports new research that has not been certified by peer review and should not be used to guide clinical practice.

## 24 Abstract

25 **Background:** Young adults are exposed to a variety of risk-related behaviours such as alcohol, smoking,  
26 and changes in dietary habits, which may result in unknown outcomes in their oral health. There is  
27 limited evidence on whether different risk behaviours are associated with oral health behaviours in  
28 the university student population. This study gathers data on the behaviours of students in their first  
29 year of university, which will inform the future development of oral health behaviour change  
30 interventions for this population.

31 **Method:** This longitudinal quantitative survey involved 205 first-year university students, aged 18-24.  
32 They completed questionnaires at baseline and a 6-month follow-up interval providing information  
33 regarding self-reported oral health status, hygiene routines, risk behaviours (e.g., diet, smoking,  
34 alcohol) and attitudes towards digital health.

35 **Results:** The findings show associations between oral health behaviours with risk behaviours including  
36 links with oral care routines, bleeding gums, brushing frequency, with exercise, vaping, and unhealthy  
37 food and drink intake. Significant changes over the two-time points were also observed, such as the  
38 worsening of the self-reported condition of the teeth ( $p < 0.001$ ), reduction in the self-reported  
39 condition of the gums ( $p = 0.004$ ), reduced brushing frequency ( $p = 0.003$ ), less regular dental visits  
40 ( $p = 0.013$ ), more students intending to visit their previous dentist rather than finding a new dentist at  
41 university ( $p = 0.026$ ), and increased consumption of unhealthy non-alcoholic drinks ( $p = 0.003$ ). Positive  
42 changes over time include reduced alcohol consumption frequency and units ( $p = 0.030$  and  $p = 0.001$ ),  
43 fewer instances of binge drinking ( $p = 0.014$ ), and less frequent consumption of unhealthy foods  
44 ( $p = 0.034$ ).

45 **Conclusion:** The findings highlight the complex relationship between oral health and risk behaviours in  
46 this demographic. Poorer oral health behaviours are linked to engagement in risk behaviours.  
47 Therefore, oral health behaviours should be targeted alongside other risk behaviours. Tailored  
48 interventions should be developed to improve oral health and behaviour among university students.

## 49 Introduction

50 Oral health plays a significant role in overall general health and wellbeing [1]. Poor oral health is also  
51 associated with many diseases such as heart disease, stroke [2], atherosclerosis [3], diabetes [4], and  
52 cognitive decline over time [5]. Poor oral health practices can lead to oral diseases, such as dental  
53 caries and gum disease which result in pain and discomfort [6], impact an individual's ability to  
54 consume foods, communicate with others, and influence their overall state of well-being [7, 8]. Oral  
55 diseases can also negatively affect the quality of life [9], affect academic performance [10] and lead  
56 to time off university for treatment and pain [11]. It is therefore crucial to ensure that the oral health  
57 of students is understood and addressed.

58  
59 Young adults in university are exposed to new experiences during their time of transition from  
60 teenagers to adults [12]; this exposure may lead to changes in lifestyle choices which involve engaging  
61 in risk-related behaviours such as alcohol consumption, smoking, poor eating habits, poor diet, and  
62 lack of exercise [13]. These behaviours adopted during young adulthood can persist into later stages  
63 in life [14], potentially leading to future health issues [14, 15]. Moreover, while evidence exists  
64 regarding the dental health of young adults, the university setting introduces a period of newfound  
65 independence and exposure to various risk behaviours [16]. These behaviours can negatively affect  
66 individuals [13]. Consequently, the overall habits of university students may change, potentially  
67 exacerbating existing habits and behaviours. Recognising the tendency of university students to adopt  
68 unhealthy behaviours is important [17, 18], as it becomes more difficult to promote behaviour change  
69 as individuals get older [19].

70  
71 This area of research remains underexplored with limited evidence available to comprehensively  
72 understand the correlation between oral health behaviours and risk behaviours in this demographic,  
73 particularly during the key life transition of leaving a family home for the first time and gaining greater

74 independence. Some evidence suggests that individuals in this population are exposed to risk  
75 behaviours during this period, however, there is a need for further investigation of the links between  
76 these risk behaviours and oral health, observing behaviours that occur over the first year of this life  
77 event, and the overall interplay with oral hygiene routines. In our initial patient and public involvement  
78 work, we confirmed that university students view oral health as important and are open to  
79 participating in oral health research which requires them to share insights regarding their oral hygiene  
80 and oral health risk-related behaviours. Overall, this study addresses evidence gaps and aims to build  
81 evidence on the profiles of this population with regards to oral health and risk-related behaviours.  
82 This study successfully achieved its aim by providing valuable insights and identifying areas for  
83 targeted intervention. Developing an oral health intervention tailored to this demographic would  
84 require a deeper understanding of the links to facilitate positive behaviour change.

85

## 86 **Aims and objectives:**

87 This study aimed to comprehensively assess data regarding self-reported oral health, dental  
88 attendance, oral hygiene behaviours, and health-related risk behaviours among university students,  
89 aiming to longitudinally track and assess changes or stability in the behaviours within the same group  
90 of university students who have recently left home. This aim will be achieved through the following  
91 objectives: employ a quantitative survey in a university student population to gather self-reported  
92 data describing: (a) oral health status and dental attendance, (b) oral hygiene routine and behaviours  
93 and (c) oral and general health-related risk behaviours. The employment of a follow-up survey at six  
94 months allowed for a longitudinal evaluation of behaviours in the above areas.

95

## 96 **Methodology:**

97 The study utilises a longitudinal, quantitative survey over 6-months.

98

99 **Recruitment:**

100 The recruitment process followed a convenience sampling approach, making use of advertisements  
101 such as the University research volunteering website, posters in university buildings, and university  
102 social media pages to attract participants. An initial sample size of 205 participants with comparisons  
103 between the two time points of 114 students. 205 participants volunteered and were recruited for  
104 the study and screening of participants was based on the eligibility inclusion criteria: (a) between 18-  
105 24 years old, (b) in their first year of university (c) studying or attending university for the first time,  
106 (d) living away from their family home, (e) access to a computer or mobile phone with internet  
107 connection, (f) able to comprehend and speak English, (g) available for the duration of the study and  
108 attending campus during the duration of the study and (h) complete an informed written consent  
109 form. The recruitment period started on 1<sup>st</sup> October 2022 with recruitment end date on 31<sup>st</sup> January  
110 2023. The study design and protocol were approved by the University of Manchester Research Ethics  
111 Committee (Reference: 2023-13950-27733).

112

113 **Data collection:**

114 The study gathered data through online questionnaires using the online Qualtrics software. A  
115 customised questionnaire was designed, recognising the need to tailor it specifically for university  
116 students to maximise data collection. At baseline, a demographic questionnaire and a behaviour  
117 questionnaire were sent to participants. At follow-up, the behaviour questionnaire and feedback  
118 questionnaire were sent to participants. The demographic and behaviour questionnaire were  
119 developed and modified according to the public and participant involvement work completed prior to  
120 this study. All data collected was analysed descriptively (frequency, counts, trends) and assessed to  
121 explore changes over time. It was coded and analysed using SPSS (IBM SPSS Statistics for Macintosh,  
122 Version 25.0.). For dichotomous or nominal variables between groups, Chi-Squared test was used. To

123 meet the requirement for the Chi-squared test, the individual expected count must be at least 1.  
124 Consequently, if any cell has an expected count below 1, sub-groups were merged to facilitate the Chi-  
125 squared test. Alternatively, if data grouping was not possible, the Fisher's Exact test was used. For  
126 dichotomous variables within groups between time points (baseline and follow-up) McNemar test was  
127 conducted. For continuous variables between time points Wilcoxon Signed rank test was conducted.  
128 The level of statistical significance was set at  $p < 0.05$ .

129

## 130 **Results:**

### 131 **Demographics of sampling characteristics:**

132 Excluding those who did not meet the inclusion criteria, there were 290 participants who consented.  
133 Of these 205 completed the study (70.7% response rate), with no dropouts at baseline. Participants  
134 were 66% female ( $n=135$ ) and 34% male ( $n=70$ ). Missing data appeared at random, with no discernible  
135 patterns. Mean age did not significantly differ between baseline and follow-up. Participants were  
136 ethnically diverse: White (52.2%), Asian or British Asian (32.25) and Black, Black British, Caribbean, or  
137 African (5.4%). At follow-up, 116 completed data collection (56.6% response rate); 89 dropped out  
138 from baseline. After excluding two with incorrect ID numbers, 114 completed data collection. Gender  
139 ratio: 68.4% female ( $n=78$ ), 31.6% male ( $n=36$ ). Ethnicity distribution was similar to baseline: White  
140 (46.5%), Asian or British Asian (32.5%), and Black, Black British, Caribbean, or African (7.0%).

141

### 142 **Demographic questionnaire including the use of technology:**

143 The attitudes towards technology and mobile device use were explored. The demographic data (found  
144 in the supplementary data) shows that students are engaging with technology and digital devices. The  
145 majority of students are on monthly mobile contracts (82.9%), and students are commonly using  
146 instant messaging platforms (54.1%), with the most common platforms being WhatsApp and  
147 Instagram Messenger (98.5% and 73.7%). Many students do not use a smartwatch or health device

148 (68.3%), but there is a usage of fitness or health-related applications such as Apple Health and  
149 MyFitnessPal (34.7% and 18.4% respectively). Many students are also aware of the features of  
150 connected toothbrushes such as brush tracking technology, connection with an app, and use of mobile  
151 technology (94.6%).

152

### 153 **Oral health behaviours:**

154 **At baseline** oral health behaviours showed that many students consider their oral care routine, and  
155 the condition of the teeth and gums were average to good. Around half of students prioritise fresh  
156 teeth and clean teeth (58.0% and 49.1%) as being most important with regards to their mouths.  
157 Approximately 7 out of 10 students brush twice a day (70.2%) and around 3 in 10 students have  
158 experienced toothache in the duration of this study (32.5%). Just over half of students' gums do not  
159 bleed when brushing teeth (60.5%). In relation to the dentist: the majority of responses indicated  
160 students visited the dentist less than 6 months ago (29.8%), for a routine check-up (63.2%) followed  
161 by treatment such as a filling or extraction (15.8). The majority have not registered with a dentist since  
162 starting university (95.6%) with 60.5% intending to continue visiting their current dentist. **At follow-**  
163 **up,** students now prioritise having white teeth and avoiding toothache (50.9% and 28.1%) as being  
164 most important with regards to their mouths. 68.4% of students are brushing their teeth twice a day  
165 and levels of bleeding gums is unchanged. In relation to the dentist: most students visited the dentist  
166 more than 1 year ago but less than 2 years ago for similar reasons to baseline. Students have continued  
167 to not register with a new dentist (95.6%) and more students intend to continue visiting their current  
168 dentist (78.1%). All data available in the S2 text.

169

170

171

### 172 **Risk behaviours:**

173 **Baseline** data on risk behaviours reveals that 10.5% of students smoke, mostly less than 5 cigarettes  
174 daily (83.3%), starting 6-12 months ago (50.0%). Vaping is less common, with 75.4% having never  
175 vaped and 9.6% currently doing so. Many students drink alcohol (67.5%) typically 2-4 times monthly  
176 or 2-4 times a week (both 32.5%), commonly consuming between 3-4 units or 5-6 units (both 28.6%)  
177 though consumption of 8 or more units varies. Most students exercise regularly, with 38.6% engaging  
178 more than once a week, primarily carrying out general fitness or at the gym (43.0%). Food intake is  
179 rated as average by 54.4%, with high consumption of sugary items like biscuits, cakes, cream cakes,  
180 and sweet pies (86.8%), often several times weekly (46.5%). Non-alcoholic drink intake is also believed  
181 to be average according to the participant responses from the Likert scale, with many consuming such  
182 drinks 1-2 times daily (87.5%), mostly sugary soft drinks (52.6%). Some students consume energy  
183 drinks (22.8%), with 88.5% reporting changes in consumption since starting university. **Follow-up** data  
184 on risk behaviours indicate that 7.0% of students smoke, with 75.0% smoking less than 5 cigarettes  
185 daily. Half of students who smoke stated they began smoking over a year ago but less than two years  
186 ago (50.0%). Regarding vaping, 11.4% of students vape, with 69.3% having never done so before. Many  
187 students drink alcohol (57.0%) monthly or less (43.1%) typically consuming 1-2 units (41.5%). The  
188 frequency of 8 or more units consumed varies but generally lower levels than baseline. Exercise  
189 frequency remains high, with 56.1% engaging at least once a week, often through activities like  
190 walking or going to the gym. From a Likert scale ranging from very unhealthy to very healthy, food  
191 intake is considered average or healthy (43.0% for both) with high consumption of sugary items  
192 (86.0%), often consumed several times weekly (45.6%). Non-alcoholic drink intake is also mostly  
193 believed by students to be average (40.4%) according to participant responses from the Likert scale,  
194 with many students consuming such drinks 1-2 times daily (68.4%), favouring sugary drinks like Cola  
195 (61.4%). About a third of students drink energy drinks, mostly 1-2 per day, with many reporting  
196 changes in drinking habits since starting university (94.4%). Baseline and follow-up comparisons were  
197 only made with students that completed both questionnaires at baseline and follow-up. All data  
198 available in the S3 text.



199

200 **Significant study data:**

201 There were significant associations between many variables in the study, including oral health  
202 behaviours and risk behaviours. At baseline, the associations that were seen are shown in Table 1  
203 below and the associations at follow-up are shown in Table 2.

204

205 **Table 1:** Associations between different variables in the study behaviour data at baseline.

| Study data comparisons (baseline):                      | Direction of association                                             | Test statistic <sup>a</sup> , P value <sup>b</sup> , Effect size <sup>c</sup> |
|---------------------------------------------------------|----------------------------------------------------------------------|-------------------------------------------------------------------------------|
| Exercise and oral care routine rating                   | Exercising more frequently = a better oral care routine rating       | X <sup>2</sup> (8)=21.065, p=0.008, Cramer's V=0.227                          |
| Food intake and condition of the gums                   | Unhealthy food consumption = poorer self-reported condition of gums  | X <sup>2</sup> (6)=16.786, p=0.010, Cramer's V=0.202                          |
| Frequency of food intake and condition of the teeth     | Consuming unhealthy foods more frequently = less healthy teeth       | X <sup>2</sup> (6)=22.414, p=0.001, Cramer's V=0.234                          |
| Non-alcoholic drink intake and oral care routine rating | Healthy non-alcoholic drink intake = better oral care routine rating | X <sup>2</sup> (6)=16.890, p=0.010, Cramer's V=0.203                          |

<sup>a</sup>Chi-squared test with degrees of freedom. <sup>b</sup>Significance level is set at p<0.05. <sup>c</sup>Cramer's V value.

206

207 **Table 2:** Associations between different variables in the study behaviour data at follow-up.

| Study data comparisons (follow-up)                                 | Direction of association                                                    | Test statistic <sup>a</sup> , P value <sup>b</sup> , Effect size <sup>c</sup> |
|--------------------------------------------------------------------|-----------------------------------------------------------------------------|-------------------------------------------------------------------------------|
| Exercise and bleeding gums                                         | Exercising less frequently = bleeding gums                                  | X <sup>2</sup> (4)=13.113, p=0.011, Cramer's V=0.339                          |
| Exercise and brushing frequency                                    | Exercising more frequently = brushing more frequently                       | X <sup>2</sup> (2)=8.822, p=0.012, Cramer's V=0.278                           |
| Vaping status and bleeding gums                                    | Never vaped = no bleeding gums                                              | X <sup>2</sup> (2)=8.122, p=0.017, Cramer's V=0.267                           |
| Non-alcoholic drink intake and oral care routine rating            | Healthy non-alcoholic drink intake = better oral care routine               | X <sup>2</sup> (4)=17.030, p=0.002, Cramer's V=0.273                          |
| Non-alcoholic drink intake and condition of gums                   | Healthy non-alcoholic drink intake = better self-reported condition of gums | X <sup>2</sup> (6)=20.935, p=0.002, Cramer's V=0.303                          |
| Frequency of non-alcoholic drink intake and condition of the teeth | Less frequent non-alcoholic drink intake = better condition of teeth        | X <sup>2</sup> (6)=19.797, p=0.003, Cramer's V=0.295                          |
| Frequency of non-alcoholic drink intake and brushing frequency     | More frequent non-alcoholic drink intake = brushing less frequently         | X <sup>2</sup> (6)=24.637, p<0.001, Cramer's V=0.329                          |

<sup>a</sup>Chi-squared test with degrees of freedom. <sup>b</sup>Significance level is set at p<0.05. <sup>c</sup>Cramer's V value

208

## 209 Comparisons between baseline and follow-up

210 Associations between variables in the study data at the two time-points (baseline and follow-up) are  
211 shown below in Table 3.

212 **Table 3:** Associations between variables in the study data between the two time-points.

| Comparisons significances over time points:                                                                                                                                                                                     | Test statistic <sup>a</sup> , P value <sup>b</sup> , Effect size <sup>c</sup> |
|---------------------------------------------------------------------------------------------------------------------------------------------------------------------------------------------------------------------------------|-------------------------------------------------------------------------------|
| Condition of the teeth ↓                                                                                                                                                                                                        | Z=-3.499, p<0.001, r=-0.32                                                    |
| Condition of the gums ↓                                                                                                                                                                                                         | Z=-2.873, p=0.004, r=-0.27                                                    |
| Brushing frequency ↓                                                                                                                                                                                                            | Z=-2.987, p=0.003, r=-0.27                                                    |
| How long since last visit to the dentist ↑                                                                                                                                                                                      | Z=-2.497, p=0.013, r=-0.23                                                    |
| Intend to visit home dentist ↑ or new dentist ↓                                                                                                                                                                                 | Z=-3.035, p=0.002, r=-0.28                                                    |
| Alcohol consumption frequency ↓                                                                                                                                                                                                 | Z=-2.169, p=0.030, r=-0.20                                                    |
| How many units of alcohol ↓                                                                                                                                                                                                     | Z=-5.651, p<0.001, r=-0.53                                                    |
| 8 or more units of alcohol ↓                                                                                                                                                                                                    | Z=-2.450, p=0.014, r=-0.23                                                    |
| Frequency of food intake ↓                                                                                                                                                                                                      | Z=-2.903, p=0.004, r=-0.27                                                    |
| Non-alcoholic drink intake ↓                                                                                                                                                                                                    | Z=-2.083, p=0.037, r=-0.20                                                    |
| <sup>a</sup> Wilcoxon signed-rank test, <sup>b</sup> Significance level is set at p<0.05, <sup>c</sup> Correlation coefficient r statistic, ↑ refers to an increase over study period, ↓ refers to a decrease over study period |                                                                               |

213  
214 Overall, many patterns and trends were seen in the data that show differences in time in the oral  
215 health behaviours and risk behaviours that were explored in this demographic. Some oral health  
216 behaviours saw no statistical differences over time such as the rating of oral care routine (p=0.075),  
217 bleeding gums (p=0.567) and toothache (p=0.410). Some risk behaviours saw no statistically significant  
218 differences over time such as smoking (p=0.401), vaping (p=0.431), happiness regarding weight  
219 (p=0.488), energy drink consumption (p=0.253), energy drink frequency (p=0.194), changes in energy  
220 drinks (p=0.105). Changes over time were also not seen in exercise levels (p=0.976). In relation to  
221 dental attendance, the importance of attending the dentist regularly saw no statistical difference over  
222 time (p=0.324), as well as a reason to visit the dentist (p=0.687). More detailed non-significant  
223 comparisons can be seen in the S1 text. In summary, oral health behaviours, outcomes associated with  
224 risk behaviours, and risk behaviours over 6 months were explored. Poor oral health behaviours are  
225 associated with some risk behaviours and some behaviours have not changed since starting university.  
226

## 227 **Discussion:**

### 228 **Summary of findings:**

229 The data can be used to evaluate the oral health behaviours and risk behaviours of university students.

230 The study reveals a comprehensive association between various lifestyle and oral health outcomes  
231 among university students. Specifically, alcohol consumption, vaping, and regular consumption of  
232 unhealthy drinks are all correlated with oral health such as deteriorating condition of the teeth, rating  
233 of oral care routine, and bleeding gums. Infrequent dental visits are prevalent among most university  
234 students. However, overweight status does not exhibit a significant association with these variables,  
235 while exercise remains widespread within this demographic. Importantly, the study also highlights an  
236 overall reduction in brushing frequency among university students.

237

238 The findings from the demographic analysis reveal several key trends among the student population  
239 surveyed such as regular usage of text messages and instant messaging platforms among students,  
240 and the vast majority of students are aware of the functionalities offered by connected toothbrushes,  
241 with 80.5% recognising their connection capabilities with a mobile application. These findings strongly  
242 suggest that the demographic under study has a widespread reliance on technology for various  
243 purposes, including communication, fitness tracking, and health management. This reflects the use of  
244 technology by university students and young adults [20].

245

246 The data revealed at baseline, students' top priority was having 'fresh teeth' or 'clean teeth' while at  
247 follow-up, their priorities or concerns shifted to having 'white teeth.' This suggests that students have  
248 shifted their priorities. Additionally, concerns about appearance among this age group may have  
249 prompted students to prioritise having white teeth. Current research supports these findings, as the  
250 appearance of teeth impacts an individual's attractiveness and plays a role in social interactions [21,  
251 22]. Given that young adults are often more conscious of their appearance, especially in social settings

252 [23], may cause individuals to have the desire to have white teeth [24]. This underscores the  
253 importance of social interactions during a student's time at university [25] and the importance of  
254 dental appearances in shaping perceptions and interactions [26].

255

256 The study findings raise awareness of the lack of registration for new dental services and most  
257 students intending to visit their previous dentist and not find a new dentist whilst at university. This  
258 may be due to the lack of new NHS dentists taking on new patients during these times due to capacity  
259 [27]. Also, the last visits to the dentist have gone from 'less than 6 months ago' to 'more than 1 year  
260 ago but less than 2 years ago.' Suggesting, most students have not attended the dentist whilst at  
261 university at the time points. More research needs to be explored to assess whether students do visit  
262 the dentist whilst at university with normal university courses being between 3-5 years and an NHS  
263 dentist registration period of only 2 years [28, 29], this may lead to many students not having an NHS  
264 dentist upon finishing university.

265

266 The rating of oral care routines is influenced by numerous factors, as indicated by their correlations  
267 with exercise, and non-alcoholic drink intake. These associations show the intertwined nature of oral  
268 health behaviours with broader lifestyle choices. Research supports the notion that regular exercise  
269 can safeguard against diseases and promote overall well-being [30], including oral health benefits such  
270 as preventing periodontal disease [31]. This study also assessed links between exercise and brushing  
271 frequency, showing that students who are more physically active are more likely to brush twice a day,  
272 current research also supports this notion [32]. Moreover, a deterioration in students' oral health over  
273 time is evident, with the worsening of self-reported conditions of the teeth and gums. The prevalence  
274 of bleeding gums among university students aligns with existing research findings [33]. There is also  
275 an association between bleeding gums and vaping gums, indicating potential long-term implications  
276 of this behaviour on gum health, with existing research also demonstrating this link [34, 35, 36].

277

278 The study findings showed that there has been a decrease in students who are brushing twice a day  
279 and an increase in students who are brushing once a day ( $Z=-2.987$ ,  $p=0.003$ ). This supports the notion  
280 that many students only brush once a day, as highlighted by Bashiru and Anthony 2014, who found  
281 that 90% of students brushed their teeth once a day. The reasons for this decrease in brushing  
282 frequency may be due to busy schedules, lack of routines, late nights studying or out partying during  
283 their time at university. It could be speculated that factors such as increased workload, stress, or  
284 changes in routine such as late nights may have contributed to this trend. There is a correlation  
285 between brushing frequency, neglecting toothbrushing and stress [37].

286

287 In this study, unhealthy food and drinks are associated with the condition of the gums, and it has been  
288 shown that dietary habits may detrimentally impact oral health, leading to increased risks of gum  
289 disease [38, 39]. The frequency of unhealthy dietary food and drink consumption has shown links with  
290 the condition of the teeth too, indicating that poor dietary habits negatively impact oral health  
291 outcomes. The decline in the consumption frequency of unhealthy foods indicates a positive shift  
292 towards a more balanced dietary pattern over time. This transition is important as it suggests potential  
293 benefits for dental health by reducing the risk of tooth decay and dental issues [40]. By decreasing the  
294 frequency of consuming sugary and unhealthy foods, students can minimise the exposure of their  
295 teeth to sugars and acids from the food, thereby reducing the likelihood of enamel demineralisation,  
296 tooth weakening, erosion, and cavities [41]. Therefore, healthy dietary habits are crucial to prevent  
297 tooth decay [42] and by cutting back on consumption, students can improve their oral health.

298

299 Alcohol consumption over time decreased overall, with reduced consumption, reduced units of  
300 consumption and fewer students binge drinking. The existing evidence supports this notion as  
301 students drink more alcohol at the start of university [43]. The trends in non-alcoholic drink intake  
302 among students reveal a prevalent consumption of sugary beverages, despite many considering their  
303 intake as average. This pattern suggests a normalisation of sugary drink consumption among students.

304 Moreover, the findings imply a connection between non-alcoholic drink intake and, the condition of  
305 the teeth and oral care routine. Individuals who consume unhealthy foods may consume more sugary  
306 drinks, thereby raising concerns about potential implications for dental health such as tooth decay  
307 and erosion [44, 45]. In addition, 31.6% of students reported consuming energy drinks which is an  
308 increase over time, with 94.4% of them indicating a change in consumption since starting university,  
309 aligning with previous research on energy drink consumption among students. Possible motivations  
310 for this trend include improving academic performance, combating fatigue, socialising, and enjoying  
311 leisure time with friends [46].

312

313

#### 314 **Key results and links:**

315 Data analysis revealed changes over time: (a) self-reported deterioration of the condition of teeth and  
316 gums over time, (b) students believe the avoidance of toothache and having white teeth are most  
317 important at follow-up, compared to fresh and clean teeth at baseline, (c) reduced brushing frequency  
318 over time, (d) consistent levels of toothache at two time points but a general prevalence of toothache  
319 overall, (e) less frequent visits to the dentist, (f) check-ups and treatments (such as fillings and/or  
320 extractions) are the most common reason for visits to the dentist, (g) students not registering with  
321 new dentists, (h) general importance of attending the dentist visible, (i) increased in students  
322 intending to visit their previous dentists, (j) general high levels of alcohol consumption, (k) decrease  
323 in alcohol consumption frequency over time, (l) decreased in the number of units of alcohol consumed  
324 over time, (m) decrease over time in the number of students consuming 8 or more units of alcohol on  
325 one occasion (binge drinking), (n) general belief that smoking, alcohol and vaping effects the mouth,  
326 (o) consensus that weight is average, (p) consistently high levels of exercise over time, (q) unhealthier  
327 food intake at baseline but reduction in consumption of unhealthy foods over time, (r) unhealthy non-  
328 alcoholic drink intake but improvements over time, (s) consistently high levels of energy drink  
329 consumption over time, (t) increase in energy drink consumption since starting university.

330

331 **Direction of future work:**

332 Future research could focus on developing interventions specifically designed for university students  
333 aimed at addressing improving attitudes, oral health behaviours and associated risk behaviours  
334 prevalent during their academic period.

335

336 **Strengths:**

337 Feedback from participants, collected through the end-of-study questionnaire, reflects high levels of  
338 satisfaction and enjoyment, with 91.1% expressing enjoyment in participation and 96.5% agreeing on  
339 the importance of the study topic. These results underscore strong support for the study. The  
340 preference for the online questionnaire format suggests the demographics' comfort and familiarity  
341 with digital platforms, reflecting their frequent engagement with online platforms and the potential  
342 to use digital technology for future research endeavours or interventions. The study participants also  
343 studied eight of the most enrolled-in degree programmes offered at the University of Manchester  
344 [47]. The use of a diverse sample with students enrolled in a wide range of academic subjects  
345 constitutes a strength of this study. By including participants from various fields of study, the research  
346 encompassed a broad spectrum of perspective, enhancing the richness and representativeness of the  
347 data collected. Importantly, this approach facilitated the capture of insights from individuals not  
348 exclusively studying health-related subjects, who may be more health conscious.

349

350 **Limitations:**

351 The reliance on self-reported data for assessing behaviours and attitudes introduces potential  
352 limitations due to social desirability and recall biases, as participants may provide responses that  
353 conform to societal norms rather than accurately reflecting their behaviours. Efforts were made to  
354 mitigate this bias through confidentiality assurances. The anonymity provided by online

355 questionnaires may have eliminated potential social pressures or biases that could arise in face-to-  
356 face interactions. Therefore, leveraging digital platforms for data collection not only maximises  
357 participant engagement but also ensures a more efficient and inclusive process. Additionally, the  
358 dropout of participants from baseline to 6 months resulted in a smaller sample size than expected,  
359 meaning that data from participants who only completed the baseline questionnaire could not be  
360 included in the analysis of the comparisons between the two time periods. This attrition could have  
361 introduced potential attrition bias; however, the characteristics of the participants who completed  
362 the study showed no apparent difference from those who dropped out.

363

## 364 **Conclusion:**

365 The findings provide a comprehensive insight into the complex network of behaviours and attitudes  
366 among university students, revealing the prevalence of detrimental oral health behaviours and  
367 associated risk behaviours. Health outcomes and behaviours such as oral care routine rating, condition  
368 of the teeth, condition of the gums, bleeding gums, brushing frequency, exercise, vaping, and  
369 unhealthy dietary habits are interconnected, indicating a complex interplay between various lifestyle  
370 choices. The study emphasises the critical period of university life where unhealthy behaviours often  
371 emerge and potentially solidify into lifelong habits. Finding a new dentist and the lack of visits to the  
372 dentist during their time at university is concerning, highlighting the imperative for further initiatives  
373 aimed at promoting dental attendance among university students while they are residing away from  
374 home.

375

## 376 **Acknowledgments:**

377 The authors would like to thank all participating students involved in this study.



## 378 **References:**

379

- [1] S. O. Griffin, J. A. Jones, D. Brunson, P. M. Griffin and W. D. Bailey, "Burden of Oral Disease Among Older Adults and Implications for Public Health Priorities," *American journal of public health*, vol. 102, no. 3, pp. 411-418, 2012.
- [2] W. Liu, Y. Cao, L. Dong, Y. Zhu, Y. Wu, Z. Lv, Z. Iheozor-Ejiofor and C. Li, "Periodontal therapy for primary or secondary prevention of cardiovascular disease in people with periodontitis," *Cochrane Database of Systematic Reviews*, no. 4, 2019.
- [3] W. Wang, Z. Yang, Y. Wang, H. Gao, Y. Wang and Q. Zhang, "Association between Periodontitis and Carotid Artery Calcification: A Systematic Review and Meta-Analysis," *BioMed Research International*, vol. 1, no. 1, p. 1, 2021.
- [4] I. Rawal, S. Ghoch, S. S. Hameed, R. Shivashankar, V. S. Ajay, S. A. Patel, M. Goodman, M. K. Ali, K. M. V. Narayan, N. Tandon and D. Prabhakaran, "Association between poor oral health and diabetes among Indian adult population: potential for integration with NCDs," *BMC oral health*, vol. 19, no. 1, p. 191, 2019.
- [5] X. Qi, Z. Zhu, B. L. Plassman and B. Wu, "Dose-Response Meta-Analysis on Tooth Loss With the Risk of Cognitive Impairment and Dementia," *Journal of the American Medical Directors Association*, vol. 22, no. 10, pp. 1-2, 8 July 2021.
- [6] R. M. Benjamin, "Oral Health: The Silent Epidemic," *Public Health Reports*, vol. 152, no. 2, pp. 158-159, 2010.
- [7] M. Peres and A. Heilmann, "1.1 Impact of oral disease and oral health inequalities," in *Social inequalities in Oral Health: From Evidence to Action*, R. G. Watt, S. Listl, M. Peres and A. Heilmann, Eds., London , International Center for Oral Health Inequalities Research & Policy, 2015, pp. 4-5.
- [8] J. Hagman, U. Wide, H. Werner and M. Hakeberg, "Oral health and oral health behavior in young adults with caries disease," *BDJ Open*, vol. 7, no. 1, p. 28, 2021.
- [9] J. C. Spanemberg, J. A. Cardoso, E. M. G. B. Slob and J. Lopez-Lopez, "Quality of life related to oral health and its impact in adults," *Journal of Stomatology, Oral and Maxillofacial Surgery*, vol. 129, no. 3, pp. 234-239, 2019.
- [10] H. Seirawan, S. Faust and R. Mulligan, "The Impact of Oral Health on the Academic Performance of Disadvantaged Children," *American Journal of Public Health*, vol. 102, no. 9, pp. 1729-1734, 2012.
- [11] S. A. Karam, F. d. S. Costa, F. Schwendicke, M. B. Correa and F. F. Demarco, "Oral health and academic performance or absenteeism: Findings from a University in Southern Brazil," *Community Dentistry and Oral Epidemiology*, vol. 49, no. 3, pp. 267-274, 2020.
- [12] K. Peltzer and S. Pengpid, "Dental health status and oral health behavior among university students from five ASEAN countries," *Nagoya Journal of Medical Science*, vol. 79, no. 2, pp. 123-133, 2017.
- [13] V. Shetty, J. Yamamoto and K. Yale, "Re-architecting oral healthcare for the 21st century," *Journal of dentistry*, vol. 74, no. 1, pp. 10-14, 2018.
- [14] Public Health England , "Early adolescence: applying All Our Health," 16 December 2019. [Online]. Available: <https://www.gov.uk/government/publications/early-adolescence-applying-all-our-health/early-adolescence-applying-all-our-health#fnref:5>. [Accessed 8 October 2021].
- [15] L. Steinberg, "A Social Neuroscience Perspective on Adolescent Risk-Taking," *Developmental review*, vol. 28, no. 1, pp. 78-106, 2008.
- [16] J. J. van den Berg, B. Bock, M. B. Roberts, L. A. R. Stein, P. D. Friedmann, S. A. Martin and J. G. Clarke, "Cigarette smoking as an expression of independence and freedom among inmates in

- a tobacco-free prison in the United States," *Nicotine & Tobacco Research: official journal of the Society for Research on Nicotine and Tobacco*, vol. 16, no. 2, pp. 238-242, 2014.
- [17] J. Kang, C. C. Ciecierski, E. L. Malin, A. J. Carroll, M. Gidea, L. L. Craft, B. Spring and B. Hitsman, "A Latent Class Analysis of Cancer Risk Behaviors among U.S. College Students," *Preventive medicine*, vol. 64, no. 1, pp. 121-125, 2014.
- [18] S. B. Racette, S. S. Deusinger, M. J. Strube, G. R. Highstein and R. H. Deusinger, "Changes in weight and health behaviors from freshman through senior year of college," *Journal of nutrition education and behavior*, vol. 40, no. 1, pp. 39-42, 2008.
- [19] C. Muller, K. El-Ansari and W. El-Ansari, "Health-Promoting Behavior and Lifestyle Characteristics of Students as a Function of Sex and Academic Level," *International Journal of Environmental Research and Public Health*, vol. 19, no. 12, p. 7539, 2022.
- [20] S. Mollburn, P. Fomby, J. A. Goode and A. Modile, "A life course framework for understanding digital technology use in the transition to adulthood," *Advances in life course research*, vol. 47, no. 1, pp. 1-12, 2021.
- [21] A. J. Qualtrough and F. J. Burke, "A look at dental esthetics," *Quintessence international*, vol. 25, no. 1, pp. 7-14, 1994.
- [22] M. M. Tin-Oo, N. Saddki and N. Hassan, "Factors influencing patient satisfaction with dental appearance and treatments they desire to improve aesthetics," *BMC oral health*, vol. 11, no. 1, p. 6, 2011.
- [23] T. Heiman and D. Olenik-Shemesh, "Perceived Body Appearance and Eating Habits: The Voice of Young and Adult Students Attending Higher Education," *International Journal of Environmental Research and Public Health*, vol. 16, no. 3, p. 451, 2019.
- [24] G. R. Samorodnitzky-Naveh, S. B. Geiger and L. Levin, "Patients' satisfaction with dental esthetics," *Journal of the American Dental Association*, vol. 138, no. 6, pp. 805-808, 2007.
- [25] L. Thomas, E. Orme and F. Kerrigan, "Student Loneliness: The Role of Social Media Through Life Transitions," *Computers and Education*, vol. 146, no. 1, pp. 1-11, 2020.
- [26] D. M. Ajayi, S. O. Gbadebo and G. E. Adebayo, "Perception about tooth colour and appearance among patients seen in a tertiary hospital, South-West, Nigeria," *The Pan African Medical Journal*, vol. 38, no. 1, p. 38, 2021.
- [27] K. Khaled, "Access to NHS dental care," *BDJ in Practice*, vol. 34, no. 5, p. 5, 2021.
- [28] NHS, "Dental check-ups," 17 January 2022. [Online]. Available: <https://www.nhs.uk/live-well/healthy-teeth-and-gums/dental-check-ups/#:~:text=After%20your%20check%20dup%2C%20your,before%20your%20next%20check%20dup>. [Accessed 18 April 2024].
- [29] NICE, "Dental checks: intervals between oral health reviews," 27 October 2004. [Online]. Available: <https://www.nice.org.uk/guidance/cg19/chapter/Recommendations>. [Accessed 18 April 2024].
- [30] J. Granero-Jimenez, M. M. Lopez-Rodriguez, I. Dobarrio-Sanz and A. E. Cortes-Rodriguez, "Influence of Physical Exercise on Psychological Well-Being of Young Adults: A Quantitative Study," *International Journal of Environmental Research and Public Health*, vol. 19, no. 7, p. 4282, 2022.
- [31] British Dental Journal, "Exercise benefits dental health," 26 November 2005. [Online]. Available: <https://www.nature.com/articles/4813019#citeas>. [Accessed 12 March 2024].
- [32] J. K. Baskaradoss, M. Tavares, F. Al-Mulla, E. Al-Ozairi, M. Abu-Farha, S. Bin-Hasan, A. Alsumait, S. Devarajan and H. Alqaderi, "Association between Frequency of Toothbrushing and Metabolic Syndrome among Adolescents: A 5-Year Follow-Up Study," *International Journal of Environmental Research and Public Health*, vol. 19, no. 1, pp. 1-13, 2022.

- [33] K. Almas, A. Al-Hawish and W. Al-Khamis, "Oral hygiene practices, smoking habit, and self-perceived oral malodor among dental students," *Journal of Contemporary Dental Practice*, vol. 4, no. 4, pp. 77-90, 2003.
- [34] T. Y. Wong, Y. C. Tsang, K. W. S. Yeung and W. K. Leung, "Self-Reported Gum Bleeding, Perception, Knowledge, and Behavior in Working-Age Hong Kong Chinese—A Cross-Sectional Study," *International of Environmental Research and Public Health*, vol. 19, no. 9, pp. 1-12, 2022.
- [35] J. G. Caton, G. Armitage, T. Berglundh, I. L. C. Chapple, S. Jepsen, K. S. Kornman, B. L. Mealey, P. N. Papapanou, M. Sanz and M. S. Tonetti, "A new classification scheme for periodontal and peri-implant diseases and conditions – Introduction and key changes from the 1999 classification," *Journal of Periodontology*, vol. 89, no. 1, pp. 1-8, 2018.
- [36] W. Jeong, D.-W. Choi, Y. K. Kim, H. J. Lee, S. A. Lee, E.-C. Park and S.-I. Jang, "Associations of electronic and conventional cigarette use with periodontal disease in South Korean adults," *Journal of Periodontology*, vol. 91, no. 1, pp. 55-64, 2020.
- [37] R. Deinzer, D. Hilpert, K. Bach, M. Schawacht and A. Herforth, "Effects of academic stress on oral hygiene—a potential link between stress and plaque-associated disease?," *Journal of clinical periodontology*, vol. 28, no. 5, pp. 459-464, 2001.
- [38] K. Priyanka, K. M. Sudhir, V. C. S. Reddy, R. K. Kumar and G. Srinivasulu, "Impact of Alcohol Dependency on Oral Health – A Cross-sectional Comparative Study," *Journal of Clinical and Diagnostic Research*, vol. 11, no. 6, pp. 43-46, 2017.
- [39] R. Cheng, H. Yang, M.-y. Shao, T. Hu and X.-d. Zhou, "Dental erosion and severe tooth decay related to soft drinks: a case report and literature review," *Journal of Zhejiang University Science*, vol. 10, no. 5, pp. 395-399, 2009.
- [40] C. van Loveren, "Sugar Restriction for Caries Prevention: Amount and Frequency. Which Is More Important?," *Caries Research*, vol. 53, no. 2, pp. 168-175, 2019.
- [41] R. Touger-Decker and C. van Loveren, "Sugars and dental caries," *The American Journal of Clinical Nutrition*, vol. 78, no. 4, pp. 881-892, 2003.
- [42] G. Kitsaras, M. Goodwin, M. P. Kelly and I. A. Pretty, "Bedtime Oral Hygiene Behaviours, Dietary Habits and Children's Dental Health," *Children (Basel)*, vol. 8, no. 5, p. 416, 2021.
- [43] P. F. Tremblay, K. Graham, S. Wells, R. Harris, R. Pulford and S. E. Roberts, "When Do First-Year College Students Drink Most During the Academic Year? An Internet-Based Study of Daily and Weekly Drinking," *Journal of American College Health*, vol. 58, no. 5, pp. 401-411, 2010.
- [44] P. Moynihan, "Sugars and Dental Caries: Evidence for Setting a Recommended Threshold for Intake," *Advances in Nutrition*, vol. 7, no. 1, pp. 149-156, 2016.
- [45] S. Naorungroj, "Sugary Snack Consumption and Tooth Retention among Middle-aged Thai Adults," *Journal of International Society of Preventative and Community Dentistry*, vol. 10, no. 4, pp. 394-401, 2020.
- [46] H. H. Al-Otaibi, "Sugar Sweetened Beverages Consumption Behavior and Knowledge among University Students in Saudi Arabia," *Journal of Economics, Business and Management*, vol. 5, no. 4, pp. 173-176, 2017.
- [47] University of Manchester, "University of Manchester figures and statistics staff and students 2021/2022," 2022. [Online]. Available: <https://documents.manchester.ac.uk/display.aspx?DocID=59173>. [Accessed 18 May 2024].
- [48] B. O. Bashiru and I. N. Anthony, "Oral self-care practices among university students in Port Harcourt, Rivers State," *Nigerian Medical Journal : Journal of the Nigeria Medical Association*, vol. 55, no. 6, pp. 486-489, 2014.
